# Supplementary material for: Adherence to Updated Childcare Nutrition Regulations in Colorado, United States
Source: PubMed Central journal article supplement (PMC7156549; doi:10.3389/fpubh.2020.00102), 2020-04-08
Supplement: Data_Sheet_1.pdf [file Data_Sheet_1.pdf]

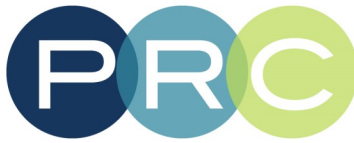

## Survey of Child Care Sites in Colorado

### Section A. Introductory questions.

**1. What is the name of your child care site? If you are a sponsor, please indicate the site for which you are completing the survey. (optional)**

\_\_\_\_\_

**3. What is your role at your current child care site?  
(Select all that apply.)**

- Corporate/ Sponsor
- Center Owner/ Franchisee
- Center Director/ Assistant Director
- Teacher
- Other (please indicate) \_\_\_\_\_

**2. What email address should we use to send your \$20 Amazon gift card to for completing the survey? (optional)**

Email: \_\_\_\_\_

- I would like to opt out of the gift card

**4. How long have you been in your role at your current child care site?**

\_\_\_\_\_ years

### Section B. About your child care site.

**5. Does your child care site participate in the U.S. Department of Agriculture's Child and Adult Care Food Program (CACFP) also known as the Federal Food Program or Child Care Food Program (CCFP)?**

- Yes
- No
- I don't know

**7. Does your site participate in the Head Start Program?**

- Yes
- No
- I don't know

**9. Is your site owned by a franchisee?**

- Yes
- No
- I don't know

**11. What age groups does your site serve?  
(Select all that apply.)**

- Children under 2
- Children ages 2-5
- School age children
- I don't know

**13. What is your site's total enrollment capacity for each age category?**

Children under 2 years: \_\_\_\_\_

Children ages 2-5 years: \_\_\_\_\_

School age children: \_\_\_\_\_

**6. Does your site participate in the Early Head Start Program?**

- Yes
- No
- I don't know

**8. Is your site corporate owned?**

- Yes
- No
- I don't know

**10. How many staff are employed at your site? Staff includes anyone on your payroll (including yourself).**

\_\_\_\_\_

**12. What is the total enrollment capacity for your site?**

\_\_\_\_\_ total children

14. What is the average weekly rate per child for full time children under 2 years old to attend your child care site without scholarship or financial aid?

\$ \_\_\_\_\_ for full time children under 2 years

N/A

15. What is the average weekly rate per child for full time children ages 2-5 to attend your child care site without scholarship or financial aid?

\$ \_\_\_\_\_ for full time children 2-5 years old

N/A

### Section C. About meals at your site.

16. How many hours must a child be at your center to be offered a meal?

\_\_\_\_\_ hours

17. How long are meal times for 2-5 years olds?

\_\_\_\_\_ minutes

N/A

18. How long are meal times for school age children?

\_\_\_\_\_ minutes

N/A

19. Who prepares the menus for your site? (Select all that apply.)

- Corporate Office
- Food Program/CACFP/CCFP Sponsor
- Center Director
- On-site Kitchen/Food Manager/Cook
- Meal Planning Service (e.g. Minute Menu, Procure Software)
- Other (please indicate) \_\_\_\_\_
- I don't know

20. How far in advance are menus prepared?

- <1 week
- 1 week
- 2-3 weeks
- 4+ weeks
- I don't know

21. Do you keep menus on file?

- Yes
- No → If NO, go to Question #23
- I don't know → If I DON'T KNOW, go to Question #23

22. For how long do you keep menus on file?

- <1 month
- 1 month
- 2-3 months
- 4+ months
- I don't know

### Section C.1. Mealtime practices.

|                                                                           |     |    |              |
|---------------------------------------------------------------------------|-----|----|--------------|
| 23. Staff members must sit with the children while they eat.              | Yes | No | I don't know |
| 24. Television and/or video viewing is permitted during meal times.       | Yes | No | I don't know |
| 25. Staff members eat their own lunch with the children.                  | Yes | No | I don't know |
| 26. Staff members encourage the children to try a variety of food served. | Yes | No | I don't know |
| 27. During meals, children are encouraged to engage in conversations.     | Yes | No | I don't know |

### Section D.1. Screen time and physical activity for children under 2.

My site does not serve children under 2. → If checked, go to Question #31.

28. In an average week, how much time do children under 2 spend watching television and/or videos?

\_\_\_\_\_ hours

29. On an average day, how much time do children under 2 spend using a computer and/or tablet?

- None
- Less than 30 minutes
- 30 minutes
- More than 30 minutes
- I don't know

30. How often is outdoor play provided for children under 2? (weather permitting)

- Never
- 1 day per week
- 2 days per week
- 3 days per week
- 4 days per week
- Daily
- I don't know

## Section D.2. Screen time and physical activity for children ages 2-5.

My site does not serve children ages 2-5. —————> If checked, go to Question #35.

31. In an average week, how much time do children ages 2-5 spend watching television and/or videos?

\_\_\_\_\_ hours

33. On an average day, how much time do children ages 2-5 spend in active play or physical activity? (These could be structured activities such as staff leading a dance activity or unstructured play where children are moving around.)

- None
- Less than 30 minutes
- 30-59 minutes
- 60 or more minutes
- I don't know

32. On an average day, how much time do children ages 2-5 spend using a computer and/or tablet?

- None
- Less than 30 minutes
- 30 minutes
- More than 30 minutes
- I don't know

34. How often is outdoor play provided for children ages 2-5? (weather permitting)

- Never
- 1 day per week
- 2 days per week
- 3 days per week
- 4 days per week
- Daily
- I don't know

## Section D.3. Screen time and physical activity for school age children.

My site does not serve school age children. —————> If checked, go to Question #39.

35. In an average week, how much time do school age children spend watching television and/or videos?

\_\_\_\_\_ hours

37. On an average day, how much time do school age children spend in active play or physical activity? (These could be structured activities such as staff leading a dance activity or unstructured play where children are moving around.)

- None
- Less than 30 minutes
- 30-59 minutes
- 60 or more minutes
- I don't know

36. On an average day, how much time do school age children spend using a computer and/or tablet?

- None
- Less than 30 minutes
- 30 minutes
- More than 30 minutes
- I don't know

38. How often is outdoor play provided for school age children? (weather permitting)

- Never
- 1 day per week
- 2 days per week
- 3 days per week
- 4 days per week
- Daily
- I don't know

## Section E. Food and beverages.

39. Is clean, fresh water available to children upon request throughout the day, such as a water fountain or in a cup?

- Yes
- No
- I don't know

40. Is the site's tap water tested for contaminants?

- Yes
- No
- I don't know

## Section E.1. Food and beverages for children ages 2-5.

My site does not serve children ages 2-5. —————> **If checked, go to Question #46.**

**41. What type of milk does your site serve to children ages 2-5? (Select all that apply.)**

- Whole Milk
- Reduced-Fat (2%) Milk
- Low-Fat (1%) Milk
- Fat-Free (Skim) Milk
- I don't know

**43. How often does your site serve 100% juice as labeled on the package to children ages 2-5 as part of a meal and/or snack?**

- Never
- 1 time per week
- 2 times per week
- 3 or more times per week
- I don't know

**45. How often does your site serve regular soda/pop (such as Sprite, orange soda, grape soda, cola) to children ages 2-5?**

- Never
- 1 time per week
- 2 times per week
- 3 or more times per week
- I don't know

**42. How often does your site serve flavored milk to children ages 2-5?**

- Never
- Once a day
- Twice a day
- More than twice a day
- I don't know

**44. How often does your site serve fruit drinks or fruit-flavored beverages other than 100% fruit juice such as Sunny Delight, Hi-C, Kool Aid, or lemonade to children ages 2-5?**

- Never
- 1 time per week
- 2 times per week
- 3 or more times per week
- I don't know

## Section E.2. Food and beverages for school age children.

My site does not serve school age children. —————> **If checked, go to Question #51.**

**46. What type of milk does your site serve to school age children? (Select all that apply.)**

- Whole Milk
- Reduced-Fat (2%) Milk
- Low-Fat (1%) Milk
- Fat-Free (Skim) Milk
- I don't know

**48. How often does your site serve 100% juice as labeled on the package to school age children as part of a meal and/or snack?**

- Never
- 1 time per week
- 2 times per week
- 3 or more times per week
- I don't know

**50. How often does your site serve regular soda/pop (such as Sprite, orange soda, grape soda, cola) to school age children?**

- Never
- 1 time per week
- 2 times per week
- 3 or more times per week
- I don't know

**47. How often does your site serve flavored milk to school age children?**

- Never
- Once a day
- Twice a day
- More than twice a day
- I don't know

**49. How often does your site serve fruit drinks or fruit-flavored beverages other than 100% fruit juice such as Sunny Delight, Hi-C, Kool Aid, or lemonade to school age children?**

- Never
- 1 time per week
- 2 times per week
- 3 or more times per week
- I don't know

## Section F. Revised child care regulations.

51. Are you familiar with the revised Colorado child care regulations for nutrition and physical activity that went into effect in February 2016?

- Yes → If yes, go to Question #52.
- No → If NO, go to Question #59
- I don't know → If I DON'T KNOW, go to Question #59.

53. When did your site begin to implement the revised state regulations related to nutrition and physical activity in your child care site?

- Prior to February 2016
- March 2016-December 2016
- January 2017 or later
- No changes needed. We were already compliant.
- I don't know

55. To what extent did the revised state regulations related to nutrition require more work and resources related to kitchen facilities?

- Very Much
- Somewhat
- Not at all
- I don't know

57. To what extent do you feel that your site needed help to implement the revised state regulations related to nutrition and physical activity in your child care site?

- Very Much
- Somewhat
- Not at all
- I don't know

59. What is your name? (optional)

---

52. To what extent do you feel that your site was prepared to make changes so that your site met the revised state regulations?

- Very Much
- Somewhat
- Not at all
- I don't know

54. To what extent did the revised state regulations related to nutrition and physical activity require more work and resources related to staffing?

- Very Much
- Somewhat
- Not at all
- I don't know

56. Did the revised state regulations related to physical activity require your center to purchase additional playground or activity equipment? If YES, what type of equipment?

- Yes (please indicate) \_\_\_\_\_
- No
- I don't know

58. Did you get technical assistance from any agency or organization to implement the revised state regulations related to nutrition and physical activity? If YES, what agency or organization provided technical assistance?

- Yes (please indicate) \_\_\_\_\_
- No
- I don't know

**Thank you for your participation!**

Please return this survey in the postage paid, enclosed envelope.

Upon receipt of the completed survey, we will send you a \$20 gift card to Amazon.com.
